# Supplementary material for: De novo designed positively charged tape-forming peptides: self-assembly and gelation in physiological solutions and their evaluation as 3D matrices for cell growth
Source: Royal Society of Chemistry journal article supplement (doi:10.1039/c0sm00974a), 2011-01-01

## Supplementary information

**Table 5:**

a) A summary of the statistical data comparing peptide P<sub>11</sub>-8 to collagen control gels.

b) Approximate cell numbers contained in peptide P<sub>11</sub>-8 gel matrices and estimated cell population doublings at the end of the cell culture experiments. Data calculated using the equation: number of cells = ATPLite CPS / 15.689

| a) | Cells per well | Day 0           | Day 14         |
|----|----------------|-----------------|----------------|
|    | 500            | NS              | NS             |
|    | 5000           | NS              | Lower (p<0.05) |
|    | 50000          | Higher (p<0.05) | Lower (p<0.05) |

  

| b)                                                | Calculated Cell Number | Estimated Cell Population Doublings |
|---------------------------------------------------|------------------------|-------------------------------------|
| P <sub>11</sub> -8 500 cells.well <sup>-1</sup>   | $2.4 \times 10^3$      | 2                                   |
| P <sub>11</sub> -8 5000 cells.well <sup>-1</sup>  | $1.3 \times 10^6$      | 8                                   |
| P <sub>11</sub> -8 50000 cells.well <sup>-1</sup> | $1.9 \times 10^6$      | 5                                   |
| Collagen 500 cells.well <sup>-1</sup>             | $1.1 \times 10^6$      | 11                                  |
| Collagen 5000 cells.well <sup>-1</sup>            | $4.1 \times 10^6$      | 10                                  |
| Collagen 50000 cells.well <sup>-1</sup>           | $5.3 \times 10^6$      | 7                                   |

**Table 6:**

a) A summary of the statistical data comparing peptide P<sub>11</sub>-12 to collagen control gels.

b) Approximate cell numbers contained in peptide P<sub>11</sub>-12 gel matrices and estimated cell population doublings at the end of cell culture experiments. Data calculated using the equation ; number of cells = ATPLite CPS / 15.689

| a) | Cells per well | Day 0           | Day 14         |
|----|----------------|-----------------|----------------|
|    | 500            | NS              | NS             |
|    | 5000           | NS              | Lower (p<0.05) |
|    | 50000          | Higher (p<0.05) | Lower (p<0.05) |

| b)                                                 | Calculated Cell Number | Estimated Cell Population Doublings |
|----------------------------------------------------|------------------------|-------------------------------------|
| P <sub>11</sub> -12 500 cells.well <sup>-1</sup>   | 235                    | 0                                   |
| P <sub>11</sub> -12 5000 cells.well <sup>-1</sup>  | $7.1 \times 10^3$      | < 1                                 |
| P <sub>11</sub> -12 50000 cells.well <sup>-1</sup> | $2.2 \times 10^6$      | 5                                   |
| Collagen 500 cells.well <sup>-1</sup>              | $1.3 \times 10^6$      | 11                                  |
| Collagen 5000 cells.well <sup>-1</sup>             | $3.5 \times 10^6$      | 9                                   |
| Collagen 50000 cells.well <sup>-1</sup>            | $5.1 \times 10^6$      | 7                                   |

**Table 7:**

a) A summary of the statistical data comparing peptide P<sub>11</sub>-16 to collagen control gels.

b) Approximate cell numbers contained in peptide P<sub>11</sub>-16 gel matrices and estimated cell population doublings at the end of cell culture experiments. Data calculated using the equation number of cells = ATPLite CPS / 15.689

| a) | Cells per well | Day 0          | Day 14         |
|----|----------------|----------------|----------------|
|    | 500            | NS             | NS             |
|    | 5000           | NS             | Lower (p<0.05) |
|    | 50000          | Lower (p<0.05) | Lower (p<0.05) |

| b)                                                 | Calculated Cell Number | Estimated Cell Population Doublings |
|----------------------------------------------------|------------------------|-------------------------------------|
| P <sub>11</sub> -16 500 cells.well <sup>-1</sup>   | 396                    | 0                                   |
| P <sub>11</sub> -16 5000 cells.well <sup>-1</sup>  | $2.4 \times 10^4$      | 2                                   |
| P <sub>11</sub> -16 50000 cells.well <sup>-1</sup> | $4.6 \times 10^3$      | 0                                   |
| Collagen 500 cells.well <sup>-1</sup>              | $1.8 \times 10^6$      | 11                                  |
| Collagen 5000 cells.well <sup>-1</sup>             | $5 \times 10^6$        | 10                                  |
| Collagen 50000 cells.well <sup>-1</sup>            | $6.3 \times 10^6$      | 7                                   |

**Table 8:**

a) A summary of the statistical data comparing peptide P<sub>11</sub>-18 to collagen control gels.

b) Approximate cell numbers contained in peptide P<sub>11</sub>-18 gel matrices and estimated cell population doublings at the end of cell culture experiments. Data calculated using the equation number of cells = ATPLite CPS / 15.689

| a) | Cells per well | Day 0          | Day 14         |
|----|----------------|----------------|----------------|
|    | 500            | NS             | Lower (p<0.05) |
|    | 5000           | NS             | Lower (p<0.05) |
|    | 50000          | Lower (p<0.05) | Lower (p<0.05) |

| b)                                                 | Calculated Cell Number | Estimated Cell Population Doublings |
|----------------------------------------------------|------------------------|-------------------------------------|
| P <sub>11</sub> -18 500 cells.well <sup>-1</sup>   | 37                     | 0                                   |
| P <sub>11</sub> -18 5000 cells.well <sup>-1</sup>  | 90                     | 0                                   |
| P <sub>11</sub> -18 50000 cells.well <sup>-1</sup> | 224                    | 0                                   |
| Collagen 500 cells.well <sup>-1</sup>              | 2.8 × 10 <sup>6</sup>  | 11                                  |
| Collagen 5000 cells.well <sup>-1</sup>             | 4.7 × 10 <sup>6</sup>  | 10                                  |
| Collagen 50000 cells.well <sup>-1</sup>            | 7.1 × 10 <sup>6</sup>  | 7                                   |

**Table 9:**

a) Approximate cell numbers contained in collagen gels supplemented with 0.9 mg.ml<sup>-1</sup> TFA and estimated cell population doublings at the end of cell culture experiments. Data calculated using the equation number of cells = ATPLite CPS / 15.689.

b) Approximate cell numbers contained in collagen gels supplemented with 5.1 mg.ml<sup>-1</sup> TFA and estimated cell population doublings at the end of cell culture experiments. Data calculated using the equation number of cells = ATPLite CPS / 15.689.

| a)                                                                    | Calculated Cell Number      | Estimated Cell Population Doublings |
|-----------------------------------------------------------------------|-----------------------------|-------------------------------------|
| Collagen/TFA (0.9mg.ml <sup>-1</sup> ) 500 cells.well <sup>-1</sup>   | $1.6 \times 10^6$           | 11                                  |
| Collagen/TFA (0.9mg.ml <sup>-1</sup> ) 5000 cells.well <sup>-1</sup>  | $2.8 \times 10^6$           | 9                                   |
| Collagen/TFA (0.9mg.ml <sup>-1</sup> ) 50000 cells.well <sup>-1</sup> | $3.7 \times 10^6$           | 6                                   |
| Collagen Control 500 cells.well <sup>-1</sup>                         | $2.9 \times 10^6$           | 12                                  |
| Collagen Control 5000 cells.well <sup>-1</sup>                        | $3.1 \times 10^6$           | 9                                   |
| Collagen Control 50000 cells.well <sup>-1</sup>                       | $4.9 \times 10^6$           | 7                                   |
| b)                                                                    | Calculated Cell Number      | Estimated Cell Population Doublings |
| Collagen/TFA (5.1mg.ml <sup>-1</sup> ) 500 cells.well <sup>-1</sup>   | $3.3 \times 10^4$           | 6                                   |
| Collagen/TFA (5.1mg.ml <sup>-1</sup> ) 5000 cells.well <sup>-1</sup>  | $3.2 \times 10^5$           | 6                                   |
| Collagen/TFA (5.1mg.ml <sup>-1</sup> ) 50000 cells.well <sup>-1</sup> | $4.9 \times 10^6$           | 7                                   |
| Collagen Control 500 cells.well <sup>-1</sup>                         | $1.5 \times 10^6$           | 11                                  |
| Collagen Control 5000 cells.well <sup>-1</sup>                        | $3.4 \times 10^6$           | 9                                   |
| Collagen Control 50000 cells.well <sup>-1</sup>                       | $5 \times 10^6 \times 10^6$ | 7                                   |

Figure 9

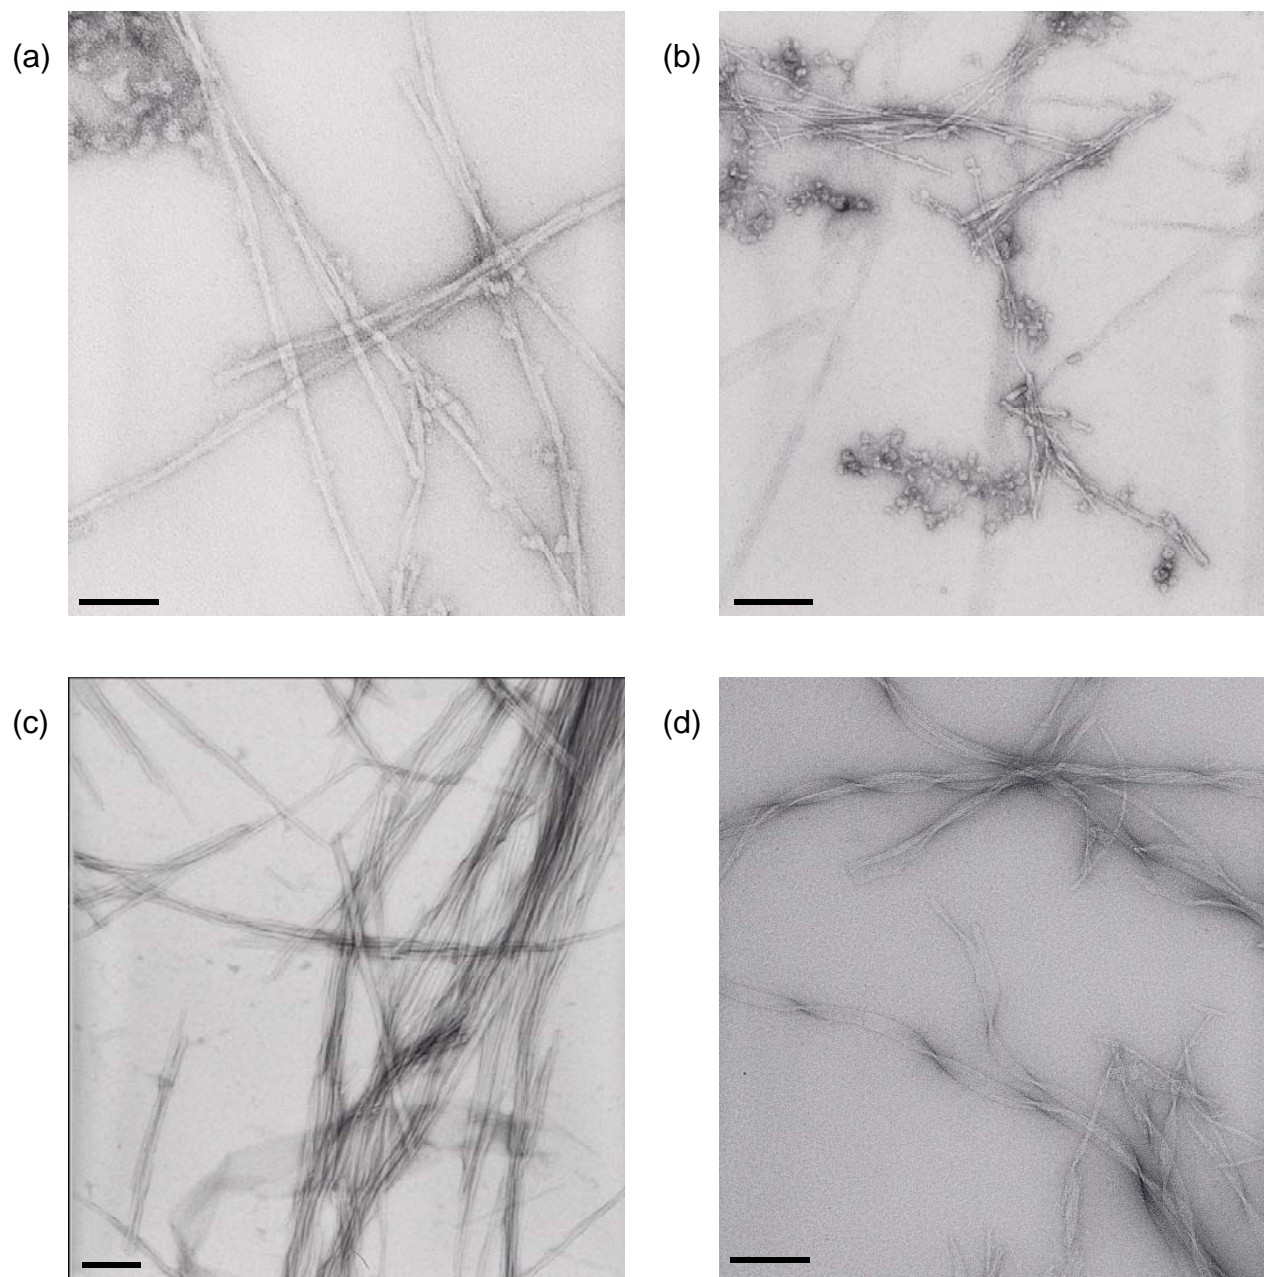

Figure 10

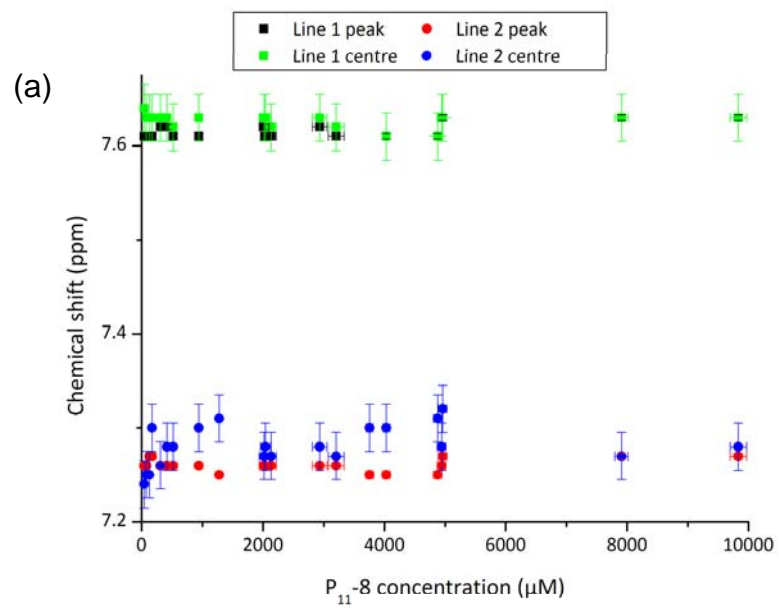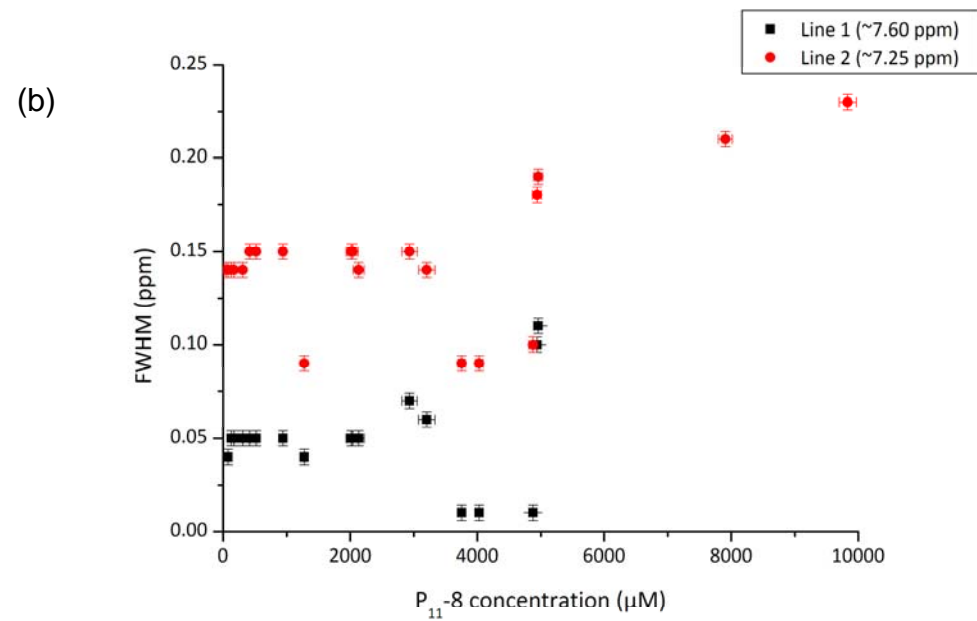

Figure 11

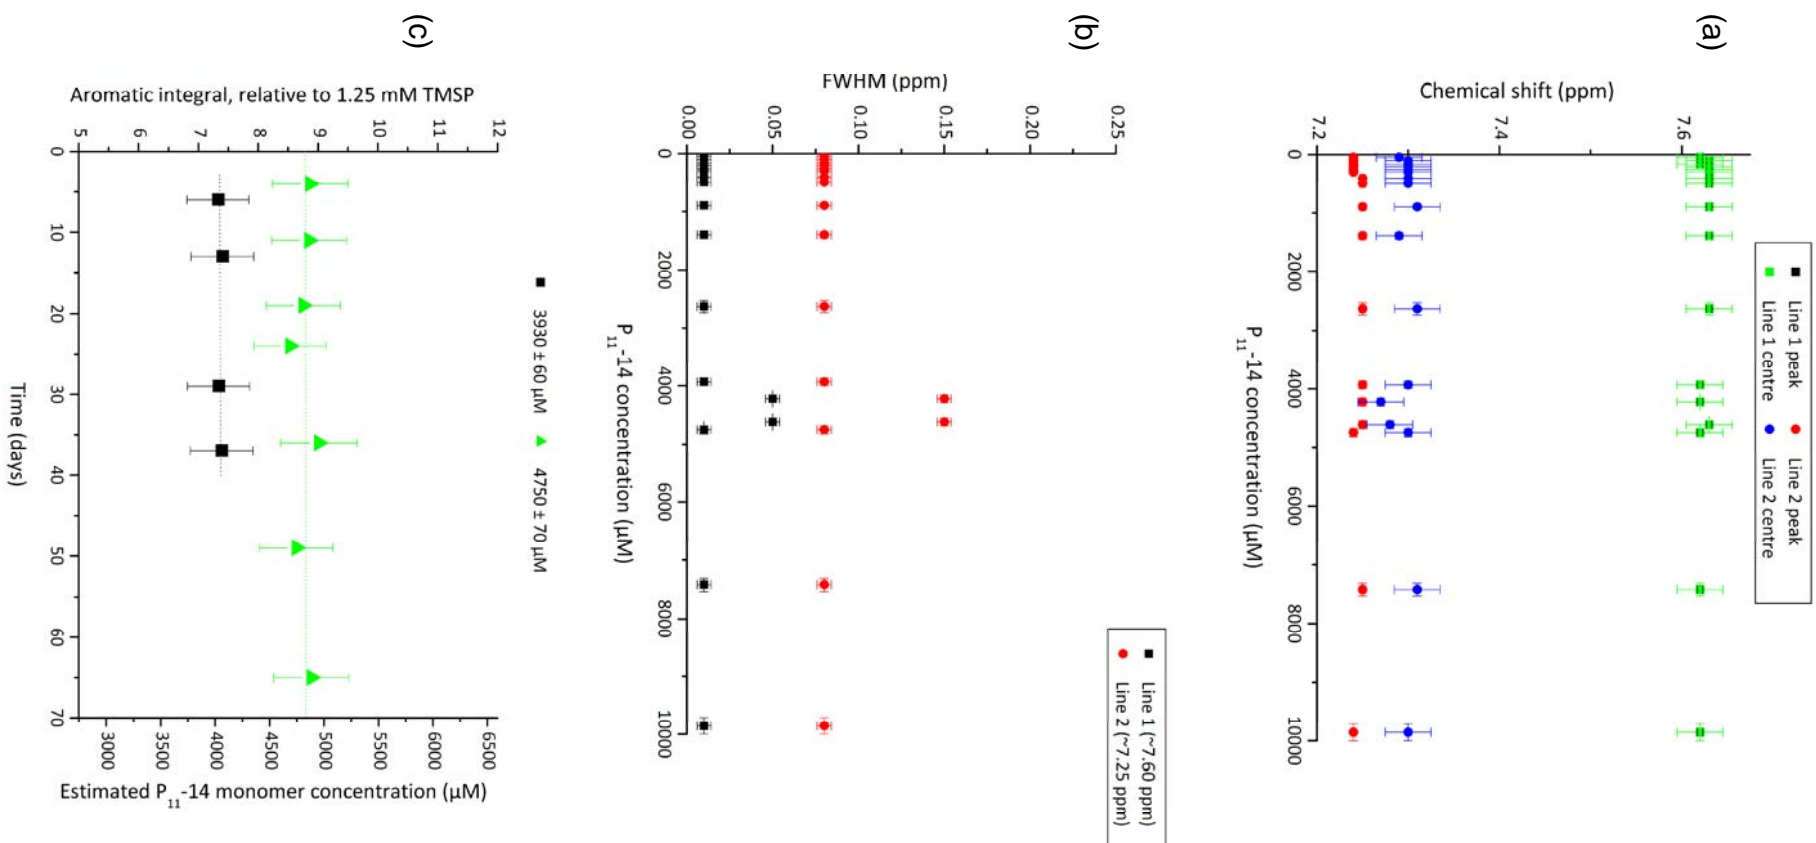



Figure 12

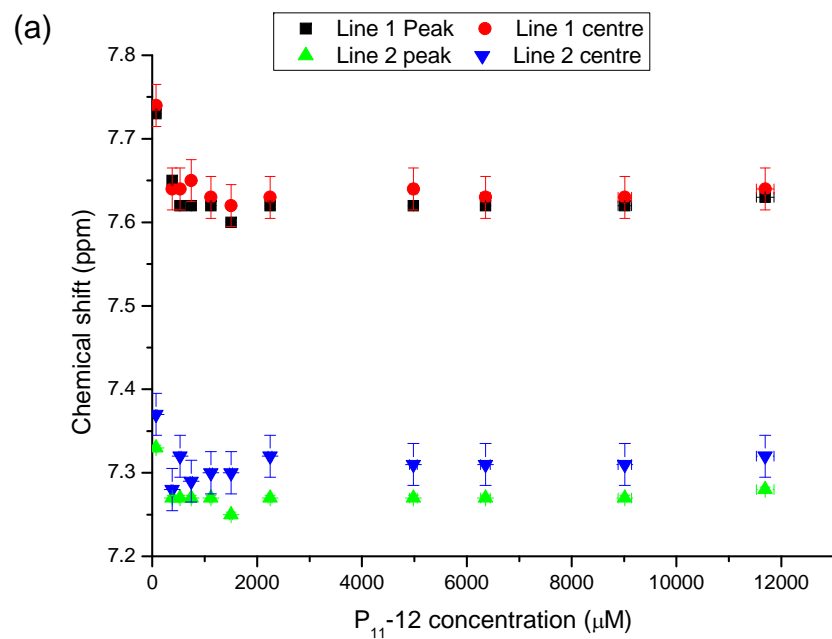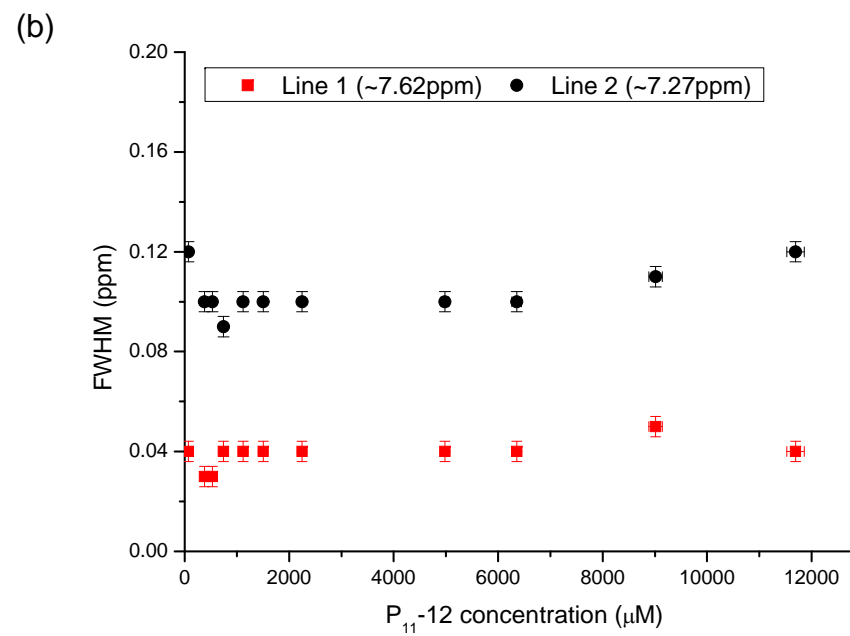

Figure 13

(a)

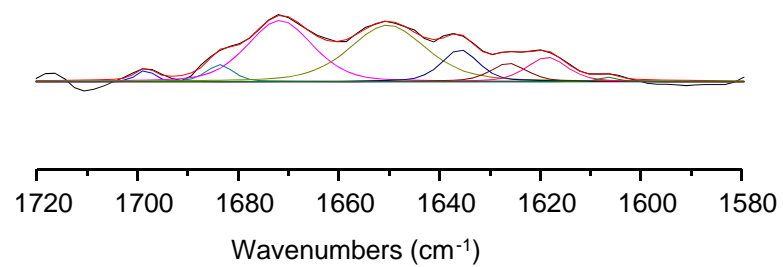

(b)

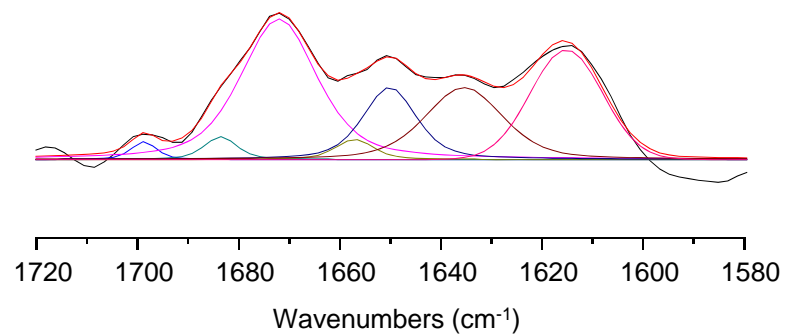

(c)

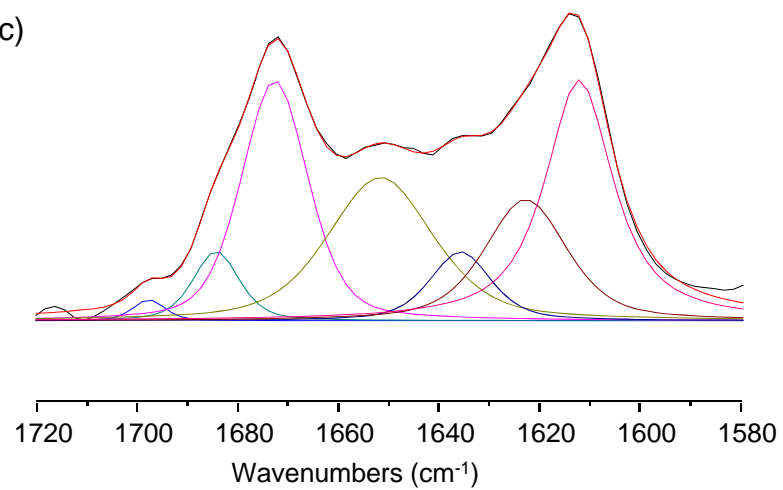

(d)

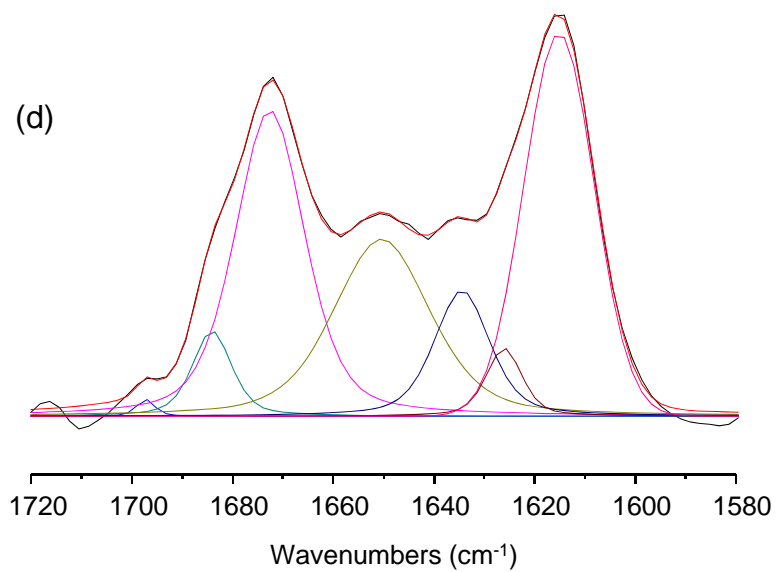

Supplement: c0sm00974a.pdf [file c0sm00974a.pdf]
